# Supplementary material for: Expression Patterns and Functional Analysis of Three SmTAT Genes Encoding Tyrosine Aminotransferases in Salvia miltiorrhiza
Source: MDPI journal article supplement (doi:10.3390/ijms242115575), 2023-10-25
Supplement: s1 [file s1]

**Table S1.**Cis-acting elements analysis of *SmTAT1* promoter

| Cis-Elements | Sequence | Number | Functions                                    |
|--------------|----------|--------|----------------------------------------------|
| ABRE         | ACGTG    | 1      | abscisic acid responsiveness element         |
| LTR          | CCGAAA   | 1      | involved in low-temperature responsiveness   |
| TATC-box     | TATCCCA  | 1      | involved in gibberellin-responsiveness       |
| G-box        | CACGTT   | 2      | involved in light responsiveness             |
| ABRE         | ACGTG    | 2      | involved in the abscisic acid responsiveness |
| MBS          | CAACTG   | 3      | involved in drought-inducibility             |

Cis-acting elements analysis of *SmTAT2* promoter

| Cis-Elements | Sequence   | Number | Functions                               |
|--------------|------------|--------|-----------------------------------------|
| ABRE         | ACGTG      | 3      | abscisic acid responsiveness element    |
| TGA-element  | AACGAC     | 1      | involved in auxin-responsive element    |
| ARE          | AAACCA     | 2      | related to the anaerobic induction      |
| G-box        | CACGTC     | 3      | involved in light responsiveness        |
| WUN-motif    | AAATTTCT   | 1      | related to the wound-responsive element |
| circadian    | CAAAGATATC | 1      | involved in circadian control           |

Cis-acting elements analysis of *SmTAT3* promoter

| Cis-Elements | Sequence | Number | Functions                            |
|--------------|----------|--------|--------------------------------------|
| ABRE         | ACGTG    | 4      | abscisic acid responsiveness element |
| TGACG-motif  | TGACG    | 2      | involved in the MeJA-responsiveness  |
| ABRE         | ACGTG    | 4      | abscisic acid responsiveness element |
| G-box        | TACGTG   | 2      | involved in light responsiveness     |
| MBS          | CAACTG   | 2      | involved in drought-inducibility     |
| P-box        | CCTTTTG  | 3      | gibberellin-responsive element       |
