# Supplementary material for: Expression Patterns and Functional Analysis of Three SmTAT Genes Encoding Tyrosine Aminotransferases in Salvia miltiorrhiza
Source: MDPI journal article supplement (doi:10.3390/ijms242115575), 2023-10-25
Supplement: s1 [file s1]

**Table S2.** List of primers used in the study.

| Primer                     | Oligo Sequence 5' to 3'            |
|----------------------------|------------------------------------|
| RT- <i>SmUbiquitin</i> -F  | ACCCTCACGGGGAAGACCATC              |
| RT- <i>SmUbiquitin</i> -R  | ACCACGGAGACGGAGGACAAG              |
| RT- <i>NtActin</i> -F      | AGTAAGCAACTGGGACGATA               |
| RT- <i>NtActin</i> -R      | CCACTAAGGACGATGTTTCC               |
| <i>SmTAT1</i> --F          | ATGGAGTTGCAGAATCCAGC               |
| <i>SmTAT1</i> --R          | TTAGTAGGAATGCCGTTACAG              |
| <i>SmTAT2</i> --F          | ATGCCAAATTCTACTGAGAGAGAG           |
| <i>SmTAT2</i> --R          | TCATTGTTTCTTGCGTGC                 |
| <i>SmTAT2</i> --F          | ATGGATGTCCGAAACAATGGT              |
| <i>SmTAT2</i> --R          | CTATATTTCTATTGCTTGGGGAGG           |
| RT- <i>SmTAT1</i> -F       | CAACTGCTGGTCTTCCACAAAC             |
| RT- <i>SmTAT1</i> -R       | GCGAGCCAAAACGGACA                  |
| RT- <i>SmTAT2</i> -F       | CGGAGATCCATCCGCCTTCC               |
| RT- <i>SmTAT2</i> -R       | CGGGAATACCGACGGTGGAG               |
| RT- <i>SmTAT3</i> -F       | TGCTGAAACTGCCAAGAGGCT              |
| RT- <i>SmTAT3</i> -R       | CCGGGCACCAACCATCTCTT               |
| <i>proSmTAT1</i> -F        | TACGGAGCCGCCCTAAAAA                |
| <i>proSmTAT1</i> -R        | TGCCGCAACTGAATCGAGAG               |
| <i>proSmTAT2</i> -F        | ATAAGTTGTTTGGGTAGCC                |
| <i>proSmTAT2</i> -R        | TGTAGCGAAGGAGGAAAG                 |
| <i>proSmTAT3</i> -F        | GGGACGACACAAAGTTTT                 |
| <i>proSmTAT3</i> -R        | AGCATCAGTTGCGTGCTG                 |
| 1391Z- <i>proSmTAT1</i> -F | CCCAAGCTTTACGGAGCCGCCCTAAAAA       |
| 1391Z- <i>proSmTAT1</i> -R | CGGGATCCTGCCGCAACTGAATCGAGAG       |
| 1391Z- <i>proSmTAT2</i> -F | CCCAAGCTTATAAGTTGTTTGGGTAGCC       |
| 1391Z- <i>proSmTAT2</i> -R | CGGGATCCTGTAGCGAAGGAGGAAAG         |
| 1391Z- <i>proSmTAT3</i> -F | CCCAAGCTTGGGACGACACAAAGTTTT        |
| 1391Z- <i>proSmTAT3</i> -R | CGGGATCCAGCATCAGTTGCGTGCTG         |
| pGEX- <i>SmTAT1</i> -F     | GGAATTCATGGAGTTGCAGAATCCAGC        |
| pGEX- <i>SmTAT1</i> --R    | CCGCTCGAGGTAGGAATGCCGTTACAG        |
| pTEV- <i>SmTAT2</i> --F    | GCGTCGACAAATGCCAAATTCTACTGAGAGAGAG |
| pTEV- <i>SmTAT2</i> --R    | CCGCTCGAGTTTGTTCCTTGCGTGC          |
| pTEV- <i>SmTAT3</i> --F    | CGGGATCCATGGATGTCCGAAACAATGGT      |
| pTEV- <i>SmTAT3</i> --R    | GCGTCGACGTATTCTATTGCTTGGGGAGG      |
